# Supplementary material for: Identification and Quantification of Coumarins by UHPLC-MS in Arabidopsis thaliana Natural Populations
Source: PubMed Central journal article supplement (PMC8005220; doi:10.3390/molecules26061804), 2021-03-23
Supplement: molecules-26-01804-s001.pdf [file molecules-26-01804-s001.pdf]

**Table S1.** The mean values (scopoletin and scopolin concentrations) and standard deviations ( $\pm$ SD) that were used in making heat maps shown in Figure 2.

| Accession | Scopoletin concentration [ $\mu$ M] |                    |                 |                 | Scopolin concentration [ $\mu$ M] |                  |                 |                 |
|-----------|-------------------------------------|--------------------|-----------------|-----------------|-----------------------------------|------------------|-----------------|-----------------|
|           | roots, H-                           | roots, H+          | leaves, H-      | leaves, H+      | roots, H-                         | roots, H+        | leaves, H-      | leaves, H+      |
| An-1      | 4.91 $\pm$ 4.12                     | 15.19 $\pm$ 11.34  | 0.10 $\pm$ 0.12 | 0.45 $\pm$ 0.24 | 14.81 $\pm$ 4.05                  | 0.13 $\pm$ 0.12  | 0.68 $\pm$ 0.41 | 0.05 $\pm$ 0.08 |
| Bay-0     | 41.93 $\pm$ 6.58                    | 151.90 $\pm$ 30.12 | 0.29 $\pm$ 0.18 | 1.99 $\pm$ 1.46 | 38.95 $\pm$ 10.69                 | 07.15 $\pm$ 6.36 | 3.81 $\pm$ 1.22 | 0.88 $\pm$ 1.53 |
| Br-0      | 35.01 $\pm$ 9.48                    | 139.27 $\pm$ 49.38 | 0.31 $\pm$ 0.09 | 2.61 $\pm$ 0.27 | 67.26 $\pm$ 23.82                 | 1.22 $\pm$ 0.08  | 1.65 $\pm$ 0.08 | 0               |
| C24       | 4.92 $\pm$ 2.67                     | 16.63 $\pm$ 10.42  | 0.20 $\pm$ 0.11 | 0.83 $\pm$ 0.55 | 41.36 $\pm$ 24.8                  | 0.43 $\pm$ 0.19  | 0.85 $\pm$ 0.59 | 0               |
| Can-0     | 3.14 $\pm$ 1.89                     | 64.03 $\pm$ 84.91  | 0.14 $\pm$ 0.14 | 0.37 $\pm$ 0.12 | 34.63 $\pm$ 4.85                  | 0.56 $\pm$ 0.05  | 2.23 $\pm$ 1.24 | 0.19 $\pm$ 0.33 |
| Col-0     | 11.79 $\pm$ 3.16                    | 29.60 $\pm$ 11.41  | 0.31 $\pm$ 0.41 | 1.16 $\pm$ 0.99 | 11.47 $\pm$ 3.41                  | 0.46 $\pm$ 0.07  | 1.48 $\pm$ 0.67 | 0               |
| Cvi-1     | 4.58 $\pm$ 0.62                     | 11.54 $\pm$ 7.57   | 0.19 $\pm$ 0.10 | 0.61 $\pm$ 0.27 | 35.41 $\pm$ 32.83                 | 0.35 $\pm$ 0.16  | 2.15 $\pm$ 0.8  | 0               |
| Eil-0     | 8.03 $\pm$ 4.90                     | 21.55 $\pm$ 14.72  | 0.15 $\pm$ 0.03 | 0.53 $\pm$ 0.23 | 28.24 $\pm$ 11.10                 | 1.12 $\pm$ 0.2   | 2.19 $\pm$ 1.16 | 0.02 $\pm$ 0    |
| Eri-0     | 12.86 $\pm$ 3.96                    | 23.84 $\pm$ 13.33  | 0.13 $\pm$ 0.09 | 0.68 $\pm$ 0.48 | 20.55 $\pm$ 8.45                  | 2.04 $\pm$ 0.3   | 2.24 $\pm$ 0.93 | 0.03 $\pm$ 0.04 |
| Est-1     | 14.85 $\pm$ 1.63                    | 36.79 $\pm$ 2.44   | 0.42 $\pm$ 0.19 | 2.01 $\pm$ 0.86 | 32.22 $\pm$ 12.66                 | 0.44 $\pm$ 0.2   | 6.48 $\pm$ 3.7  | 0.07 $\pm$ 0.09 |
| Fei-0     | 12.82 $\pm$ 8.73                    | 52.02 $\pm$ 15.32  | 0.09 $\pm$ 0.06 | 0.73 $\pm$ 0.37 | 62.36 $\pm$ 28.64                 | 0.52 $\pm$ 0.08  | 2.77 $\pm$ 1.53 | 0.08 $\pm$ 0.13 |
| Fuk-1     | 13.06 $\pm$ 7.87                    | 44.36 $\pm$ 47.37  | 0.13 $\pm$ 0.01 | 0.62 $\pm$ 0.11 | 29.23 $\pm$ 27.52                 | 8.09 $\pm$ 7.02  | 1.58 $\pm$ 0.62 | 0.05 $\pm$ 0.09 |
| Ga-0      | 3.40 $\pm$ 1.11                     | 19.67 $\pm$ 12.65  | 0.03 $\pm$ 0.01 | 0.55 $\pm$ 0.16 | 53.08 $\pm$ 7.05                  | 1.29 $\pm$ 0.25  | 3.03 $\pm$ 0.58 | 0.12 $\pm$ 0.25 |
| Hog       | 7.47 $\pm$ 7.02                     | 20.31 $\pm$ 20.17  | 0.10 $\pm$ 0.06 | 0.34 $\pm$ 0.12 | 16.9 $\pm$ 14.41                  | 0.85 $\pm$ 0.52  | 1.03 $\pm$ 0.46 | 0               |
| Kas-2     | 4.95 $\pm$ 0.33                     | 22.71 $\pm$ 7.70   | 0.04 $\pm$ 0.01 | 0.39 $\pm$ 0.21 | 21.39 $\pm$ 17.39                 | 0.59 $\pm$ 0.26  | 1.54 $\pm$ 0.63 | 0.24 $\pm$ 0.41 |
| Kondara   | 42.79 $\pm$ 9.84                    | 81.30 $\pm$ 25.39  | 0.26 $\pm$ 0.27 | 1.05 $\pm$ 0.29 | 25.10 $\pm$ 16.58                 | 0.86 $\pm$ 0.71  | 0.80 $\pm$ 0.14 | 0.04 $\pm$ 0.08 |
| Kyo-0     | 5.20 $\pm$ 1.63                     | 26.87 $\pm$ 18.45  | 0.04 $\pm$ 0.04 | 0.82 $\pm$ 0.53 | 33.97 $\pm$ 12.23                 | 0.77 $\pm$ 0.26  | 3.50 $\pm$ 2.50 | 0               |
| Leb 3/4   | 17.93 $\pm$ 5.89                    | 34.91 $\pm$ 19.59  | 0.19 $\pm$ 0.11 | 0.72 $\pm$ 0.36 | 41.77 $\pm$ 27.88                 | 0.84 $\pm$ 0.19  | 2.26 $\pm$ 1.41 | 0               |
| Ler-1     | 3.88 $\pm$ 1.52                     | 8.89 $\pm$ 2.94    | 0.04 $\pm$ 0.07 | 0.27 $\pm$ 0.05 | 2.94 $\pm$ 0.66                   | 0.23 $\pm$ 0.07  | 0.69 $\pm$ 0.07 | 0.16 $\pm$ 0.27 |
| No-0      | 2.61 $\pm$ 1.17                     | 8.35 $\pm$ 8.20    | 0.19 $\pm$ 0.14 | 1.10 $\pm$ 0.92 | 10.26 $\pm$ 6.89                  | 1.09 $\pm$ 0.16  | 3.41 $\pm$ 1.92 | 0.06 $\pm$ 0.11 |
| Ri-0      | 11.42 $\pm$ 4.05                    | 44.55 $\pm$ 21.08  | 0.13 $\pm$ 0.06 | 0.48 $\pm$ 0.49 | 41.47 $\pm$ 25.01                 | 5.15 $\pm$ 0.93  | 2.06 $\pm$ 1.03 | 0               |
| Sf-2      | 5.12 $\pm$ 3.51                     | 11.29 $\pm$ 8.85   | 0.05 $\pm$ 0.03 | 0.22 $\pm$ 0.14 | 10.67 $\pm$ 8.42                  | 0.42 $\pm$ 0.15  | 0.99 $\pm$ 0.29 | 0               |
| Sha-1     | 15.46 $\pm$ 0.67                    | 36.68 $\pm$ 2.00   | 0.15 $\pm$ 0.11 | 0.73 $\pm$ 0.56 | 31.31 $\pm$ 6.11                  | 3.16 $\pm$ 0.89  | 2.32 $\pm$ 1.99 | 0.15 $\pm$ 0.26 |
| Sorbo     | 15.17 $\pm$ 4.57                    | 26.08 $\pm$ 16.16  | 0.24 $\pm$ 0.26 | 1.35 $\pm$ 0.83 | 9.12 $\pm$ 6.08                   | 0.99 $\pm$ 0.27  | 5.01 $\pm$ 3.04 | 0.69 $\pm$ 0.85 |
| Ts-5      | 4.75 $\pm$ 0.38                     | 16.47 $\pm$ 14.26  | 0.08 $\pm$ 0.07 | 0.92 $\pm$ 0.55 | 7.89 $\pm$ 4.64                   | 0.64 $\pm$ 0.13  | 0.92 $\pm$ 0.61 | 0               |
| Tsu-1     | 2.71 $\pm$ 0.78                     | 10.32 $\pm$ 1.96   | 0.03 $\pm$ 0.02 | 0.14 $\pm$ 0.04 | 12.53 $\pm$ 6.06                  | 0.87 $\pm$ 0.33  | 0.35 $\pm$ 0.09 | 0.01 $\pm$ 0.01 |
| Van-0     | 4.01 $\pm$ 3.01                     | 8.02 $\pm$ 11.19   | 0.10 $\pm$ 0.09 | 0.77 $\pm$ 0.93 | 7.98 $\pm$ 6.97                   | 0.24 $\pm$ 0.09  | 2.30 $\pm$ 1.33 | 0.13 $\pm$ 0.12 |
| Ws-0      | 9.68 $\pm$ 5.92                     | 19.16 $\pm$ 18.60  | 0.16 $\pm$ 0.12 | 0.54 $\pm$ 0.12 | 30.49 $\pm$ 27.29                 | 0.58 $\pm$ 0.15  | 2.58 $\pm$ 0.36 | 0.26 $\pm$ 0.24 |

**Table S2.** The mean values (umbelliferone and skimmin concentrations) and standard deviations ( $\pm$ SD) that were used in making heat maps shown in Figure 3.

| Accession | Umbelliferone concentration [ $\mu$ M] |                 |            |            | Skimmin concentration [ $\mu$ M] |                   |                 |                 |
|-----------|----------------------------------------|-----------------|------------|------------|----------------------------------|-------------------|-----------------|-----------------|
|           | roots, H-                              | roots, H+       | leaves, H- | leaves, H+ | roots, H-                        | roots, H+         | leaves, H-      | leaves, H+      |
| An-1      | 0.02 $\pm$ 0.03                        | 0.23 $\pm$ 0.15 | 0          | 0          | 3.53 $\pm$ 2.92                  | 0.23 $\pm$ 0.34   | 0.30 $\pm$ 0.03 | 0               |
| Bay-0     | 0.16 $\pm$ 0.08                        | 1.64 $\pm$ 0.14 | 0          | 0          | 7.32 $\pm$ 1.51                  | 5.40 $\pm$ 2.98   | 0               | 0               |
| Br-0      | 0.06 $\pm$ 0.02                        | 1.05 $\pm$ 1.01 | 0          | 0          | 3.19 $\pm$ 1.58                  | 0.59 $\pm$ 0.17   | 0               | 0               |
| C24       | 0.06 $\pm$ 0.11                        | 0.97 $\pm$ 0.59 | 0          | 0          | 15.25 $\pm$ 9.47                 | 3.48 $\pm$ 4.57   | 0.30 $\pm$ 0.04 | 0               |
| Can-0     | 0                                      | 0.30 $\pm$ 0.36 | 0          | 0          | 2.59 $\pm$ 0.61                  | 0.76 $\pm$ 0.57   | 0.07 $\pm$ 0.05 | 0               |
| Col-0     | 0.15 $\pm$ 0.10                        | 1.06 $\pm$ 0.17 | 0          | 0          | 8.40 $\pm$ 5.60                  | 0.43 $\pm$ 0.41   | 0.29 $\pm$ 0.24 | 0.07 $\pm$ 0.08 |
| Cvi-1     | 0                                      | 0.07 $\pm$ 0.05 | 0          | 0          | 2.70 $\pm$ 2.16                  | 0.13 $\pm$ 0.11   | 0               | 0               |
| Eil-0     | 0                                      | 0.09 $\pm$ 0.04 | 0          | 0          | 6.38 $\pm$ 2.34                  | 0.60 $\pm$ 0.48   | 0               | 0               |
| Eri-0     | 0.14 $\pm$ 0.06                        | 0.42 $\pm$ 0.27 | 0          | 0          | 9.76 $\pm$ 2.83                  | 0.68 $\pm$ 0.69   | 0.34 $\pm$ 0.13 | 0               |
| Est-1     | 0.07 $\pm$ 0.09                        | 1.09 $\pm$ 0.67 | 0          | 0          | 12.27 $\pm$ 0.26                 | 1.64 $\pm$ 0.55   | 0               | 0               |
| Fei-0     | 0.05 $\pm$ 0.04                        | 0.31 $\pm$ 0.08 | 0          | 0          | 3.42 $\pm$ 2.05                  | 0.37 $\pm$ 0.41   | 0               | 0               |
| Fuk-1     | 0.10 $\pm$ 0.09                        | 0.72 $\pm$ 0.60 | 0          | 0          | 1.34 $\pm$ 0.42                  | 2.81 $\pm$ 3.43   | 0.10 $\pm$ 0.05 | 0               |
| Ga-0      | 0                                      | 0.20 $\pm$ 0.16 | 0          | 0          | 19.80 $\pm$ 3.01                 | 2.00 $\pm$ 1.49   | 0.13 $\pm$ 0.11 | 0               |
| Hog       | 0                                      | 0.03 $\pm$ 0.04 | 0          | 0          | 5.87 $\pm$ 1.67                  | 1.43 $\pm$ 0.87   | 0               | 0               |
| Kas-2     | 0                                      | 0.63 $\pm$ 0.18 | 0          | 0          | 2.62 $\pm$ 0.61                  | 0.09 $\pm$ 0.05   | 0               | 0               |
| Kondara   | 0.02 $\pm$ 0.04                        | 0.50 $\pm$ 0.38 | 0          | 0          | 5.11 $\pm$ 1.26                  | 0.36 $\pm$ 0.28   | 0.19 $\pm$ 0.10 | 0.01 $\pm$ 0.02 |
| Kyo-0     | 0                                      | 0.40 $\pm$ 0.27 | 0          | 0          | 11.60 $\pm$ 3.00                 | 1.14 $\pm$ 0.08   | 0               | 0               |
| Leb 3/4   | 0.11 $\pm$ 0.02                        | 0.72 $\pm$ 0.38 | 0          | 0          | 4.25 $\pm$ 2.36                  | 0.20 $\pm$ 0.13   | 0               | 0               |
| Ler-1     | 0.03 $\pm$ 0.02                        | 0.34 $\pm$ 0.11 | 0          | 0          | 2.21 $\pm$ 0.57                  | 0.48 $\pm$ 0.07   | 0               | 0               |
| No-0      | 0                                      | 0.03 $\pm$ 0.05 | 0          | 0          | 8.88 $\pm$ 6.51                  | 2.49 $\pm$ 2.48   | 0               | 0               |
| Ri-0      | 0.14 $\pm$ 0.06                        | 1.41 $\pm$ 0.68 | 0          | 0          | 13.25 $\pm$ 4.35                 | 18.76 $\pm$ 16.26 | 0               | 0               |
| Sf-2      | 0                                      | 0.29 $\pm$ 0.11 | 0          | 0          | 1.96 $\pm$ 1.58                  | 0.30 $\pm$ 0.27   | 0               | 0               |
| Sha-1     | 0.07 $\pm$ 0.03                        | 0.63 $\pm$ 0.18 | 0          | 0          | 8.01 $\pm$ 1.30                  | 0.93 $\pm$ 0.80   | 0               | 0               |
| Sorbo     | 0.24 $\pm$ 0.09                        | 0.78 $\pm$ 0.35 | 0          | 0          | 1.52 $\pm$ 0.44                  | 0.04 $\pm$ 0.05   | 0               | 0               |
| Ts-5      | 0                                      | 0.38 $\pm$ 0.31 | 0          | 0          | 0.69 $\pm$ 0.05                  | 0.23 $\pm$ 0.11   | 0               | 0               |
| Tsu-1     | 0                                      | 0.29 $\pm$ 0.07 | 0          | 0          | 5.82 $\pm$ 3.00                  | 0.51 $\pm$ 0.35   | 0.04 $\pm$ 0.06 | 0               |
| Van-0     | 0.02 $\pm$ 0.04                        | 0.63 $\pm$ 0.56 | 0          | 0          | 4.38 $\pm$ 0.91                  | 0.32 $\pm$ 0.20   | 0.25 $\pm$ 0.13 | 0.04 $\pm$ 0.06 |
| Ws-0      | 0.11 $\pm$ 0.04                        | 0.45 $\pm$ 0.31 | 0          | 0          | 14.04 $\pm$ 3.26                 | 1.42 $\pm$ 0.24   | 0.17 $\pm$ 0.08 | 0.03 $\pm$ 0.06 |

**Table S3.** The mean values (esculetin and esculin concentrations) and standard deviations ( $\pm$ SD) that were used in making heat maps shown in Figure 4.

| Accession | Esculetin concentration [ $\mu$ M] |                 |                 |                 | Esculin concentration [ $\mu$ M] |                 |                 |                 |
|-----------|------------------------------------|-----------------|-----------------|-----------------|----------------------------------|-----------------|-----------------|-----------------|
|           | roots, H-                          | roots, H+       | leaves, H-      | leaves, H+      | roots, H-                        | roots, H+       | leaves, H-      | leaves, H+      |
| An-1      | 0                                  | 0               | 0.04 $\pm$ 0.07 | 0               | 0                                | 0               | 0.02 $\pm$ 0.01 | 0               |
| Bay-0     | 0.11 $\pm$ 0.18                    | 0.26 $\pm$ 0.26 | 0               | 0               | 0                                | 0               | 0               | 0               |
| Br-0      | 0.07 $\pm$ 0.12                    | 0               | 0.14 $\pm$ 0.03 | 0               | 0                                | 0               | 0               | 0               |
| C24       | 0                                  | 0               | 0.16 $\pm$ 0.03 | 0               | 0                                | 0               | 0.01 $\pm$ 0.01 | 0               |
| Can-0     | 0.01 $\pm$ 0.02                    | 0.29 $\pm$ 0.51 | 0               | 0               | 0                                | 0               | 0.09 $\pm$ 0.15 | 0.15 $\pm$ 0.13 |
| Col-0     | 0                                  | 0.20 $\pm$ 0.14 | 0.02 $\pm$ 0.03 | 0               | 0                                | 0.01 $\pm$ 0.01 | 0.15 $\pm$ 0.21 | 0.08 $\pm$ 0.15 |
| Cvi-1     | 0                                  | 0               | 0               | 0               | 0                                | 0               | 0               | 0               |
| Eil-0     | 0                                  | 0               | 0               | 0               | 0                                | 0               | 0               | 0               |
| Eri-0     | 0                                  | 0               | 0               | 0               | 0                                | 0               | 0               | 0.07 $\pm$ 0.12 |
| Est-1     | 0                                  | 0               | 0               | 0               | 0                                | 0               | 0.12 $\pm$ 0.02 | 0               |
| Fei-0     | 0                                  | 0               | 0               | 0               | 0                                | 0               | 0               | 0               |
| Fuk-1     | 0                                  | 0               | 0               | 0               | 0                                | 0               | 0               | 0               |
| Ga-0      | 0                                  | 0               | 0               | 0               | 0                                | 0               | 0               | 0               |
| Hog       | 0                                  | 0               | 0               | 0               | 0                                | 0               | 0.01 $\pm$ 0.01 | 0               |
| Kas-2     | 0                                  | 0               | 0               | 0               | 0                                | 0               | 0.03 $\pm$ 0.05 | 0               |
| Kondara   | 0                                  | 0               | 0               | 0               | 0                                | 0               | 0               | 0               |
| Kyo-0     | 0                                  | 0               | 0               | 0               | 0                                | 0               | 0               | 0               |
| Leb 3/4   | 0                                  | 0               | 0               | 0               | 0                                | 0               | 0               | 0               |
| Ler-1     | 0                                  | 0               | 0               | 0               | 0                                | 0               | 0.01 $\pm$ 0.01 | 0.03 $\pm$ 0.06 |
| No-0      | 0                                  | 0               | 0.02 $\pm$ 0.03 | 0               | 0                                | 0               | 0.02 $\pm$ 0.04 | 0               |
| Ri-0      | 0                                  | 0.20 $\pm$ 0.06 | 0.01 $\pm$ 0.02 | 0               | 0                                | 0               | 0.04 $\pm$ 0.07 | 0               |
| Sf-2      | 0                                  | 0               | 0               | 0               | 0                                | 0               | 0               | 0               |
| Sha-1     | 0                                  | 0               | 0               | 0               | 0                                | 0               | 0               | 0               |
| Sorbo     | 0                                  | 0               | 0               | 0               | 0                                | 0               | 0               | 0               |
| Ts-5      | 0                                  | 0               | 0               | 0               | 0                                | 0               | 0               | 0.01 $\pm$ 0.02 |
| Tsu-1     | 0                                  | 0.08 $\pm$ 0.08 | 0               | 0               | 0                                | 0               | 0               | 0               |
| Van-0     | 0                                  | 0               | 0               | 0               | 0                                | 0               | 0               | 0.06 $\pm$ 0.08 |
| Ws-0      | 0                                  | 0               | 0.02 $\pm$ 0.02 | 0.01 $\pm$ 0.02 | 0                                | 0               | 0.01 $\pm$ 0.02 | 0.36 $\pm$ 0.32 |

**Table S4.** Coumarin concentrations in root samples before hydrolysis and four geographic and climatic factors used in principle component analysis (PCA). Average winter temperatures – taken from November to April; average summer temperatures – taken from May to October. Altitude and annual precipitation data are taken for the closest place where the given accession originates. Data sources [1] Temperature and precipitation (Temperature and precipitation - <https://www.climatestotravel.com/> (US: <https://www.usclimatedata.com/climate/columbia/north-carolina/united-states/usnc0145>), [2] Altitude (<https://www.freemaptools.com/elevation-finder.htm>), [3] Annual precipitation (<https://weather-and-climate.com/>).

| Altitude max | AV winter min temp [°C] | AV summer max temp [°C] | AV annual precipitation [mm] | Umbelliferone | Skimmin | Scopoletin | Scopolin | Continent     | Accession |
|--------------|-------------------------|-------------------------|------------------------------|---------------|---------|------------|----------|---------------|-----------|
| 100          | 2.5                     | 20                      | 850                          | 0.231         | 0.014   | 15.186     | 0.006    | Europe        | An-1      |
| 400          | -0.7                    | 20.7                    | 640                          | 1.644         | 0.323   | 151.905    | 0.336    | Europe        | Bay-0     |
| 300          | -0.8                    | 21.3                    | 493                          | 1.05          | 0.036   | 139.274    | 0.057    | Europe        | Br-0      |
| 30           | 6.7                     | 25.3                    | 905                          | 0.972         | 0.208   | 16.627     | 0.02     | Europe        | C24       |
| 1260         | 16                      | 26.2                    | 146                          | 0.3           | 0.046   | 64.031     | 0.026    | Africa        | Can-0     |
| 100          | 3.85                    | 27.9                    | 1265                         | 1.056         | 0.025   | 29.604     | 0.021    | North America | Col-0     |
| 1200         | 19.8                    | 26                      | 97                           | 0.067         | 0.008   | 11.538     | 0.016    | Africa        | Cvi-1     |
| 200          | 0.3                     | 20.5                    | 535                          | 0.086         | 0.036   | 21.551     | 0.052    | Europe        | Eil-0     |
| 119          | -1.5                    | 17.8                    | 660                          | 0.418         | 0.041   | 23.835     | 0.096    | Europe        | Eri-1     |
| 200          | -4.2                    | 16.5                    | 695                          | 1.088         | 0.098   | 36.793     | 0.021    | Europe        | Est-1     |
| 140          | 7                       | 22.7                    | 1255                         | 0.311         | 0.022   | 52.02      | 0.025    | Europe        | Fei-0     |
| 18           | 5.2                     | 27.7                    | 1540                         | 0.721         | 0.475   | 44.36      | 0.379    | Asia          | Fuk-1     |
| 200          | 1.3                     | 21.5                    | 620                          | 0.199         | 0.12    | 19.67      | 0.06     | Europe        | Ga-0      |
| 1887         | 2.3                     | 30.5                    | 610                          | 0.078         | 0.085   | 20.311     | 0.04     | Asia          | Hog       |
| 1580         | -1.8                    | 27                      | 215                          | 0.625         | 0.005   | 22.713     | 0.028    | Asia          | Kas-2     |
| 916          | 2.3                     | 30.5                    | 610                          | 0.499         | 0.022   | 81.3       | 0.04     | Asia          | Kondara   |
| 98           | 4.3                     | 28.3                    | 1490                         | 0.4           | 0.068   | 26.866     | 0.036    | Asia          | Kyo-1     |
| 301          | -14.6                   | 21.2                    | 264                          | 0.718         | 0.012   | 34.909     | 0.039    | Asia          | Leb 3/4   |
| 614          | 0.3                     | 20.5                    | 535                          | 0.335         | 0.028   | 8.892      | 0.011    | Europe        | Ler-1     |
| 300          | 0.33                    | 20.3                    | 665                          | 0.089         | 0.149   | 8.353      | 0.051    | Europe        | No-0      |
| 100          | 2.7                     | 19                      | 1190                         | 1.41          | 0.000   | 44.551     | 0.648    | North America | Ri-0      |
| 100          | 6.8                     | 25.2                    | 620                          | 0.288         | 0.018   | 11.291     | 0.02     | Europe        | Sf-2      |
| 3400         | -4.2                    | 25.3                    | 233                          | 0.627         | 0.056   | 36.684     | 0.148    | Asia          | Sha-1     |
| 646          | -4.3                    | 25.4                    | 234                          | 0.781         | 0.002   | 26.081     | 0.046    | Asia          | Sorbo     |
| 100          | 6.8                     | 25.2                    | 620                          | 0.382         | 0.014   | 16.469     | 0.03     | Europe        | Ts-5      |
| 100          | 4.5                     | 27.8                    | 1535                         | 0             | 0.348   | 2.711      | 0.588    | Asia          | Tsu-1     |
| 100          | 2.7                     | 19                      | 1190                         | 0.628         | 0.019   | 8.022      | 0.011    | North America | Van-0     |
| 200          | -3.5                    | 19.2                    | 675                          | 0.446         | 0.085   | 19.157     | 0.027    | Europe        | Ws-0      |
